# Supplementary material
Source: Royal Society of Chemistry journal article supplement (doi:10.1039/d6lp00078a)
Supplement: d6lp00078a1.pdf [file d6lp00078a1.pdf]

Supporting Information for

**Perspective: Ion Transport Mechanisms and the Significance of Glass Transition Temperature in PEO-based Polymer Blend Electrolytes for Next-Generation Li-Batteries**

Marissa Gallmeyer<sup>a†</sup>, Thorfinnur Baldvinsson<sup>a†</sup>, Whitney S. Loo<sup>a\*</sup>

<sup>a</sup> University of Wisconsin-Madison Department of Chemical and Biological Engineering, Madison WI, 53706

<sup>†</sup>These authors contributed equally

\*Corresponding author email: [wloo@wisc.edu](mailto:wloo@wisc.edu)

**Table of Contents**

|                                                                                                   |       |
|---------------------------------------------------------------------------------------------------|-------|
| <b>Figure S1-S21.</b> $T_g$ data Kwei fits for blends considered in this study.....               | 2-22  |
| <b>Table S1-S3.</b> Activation energy and Prefactor VTF Fits Blends considered in this study..... | 23-25 |
| <b>Table S4.</b> $T_g$ for P2 species considered in this study.....                               | 27    |

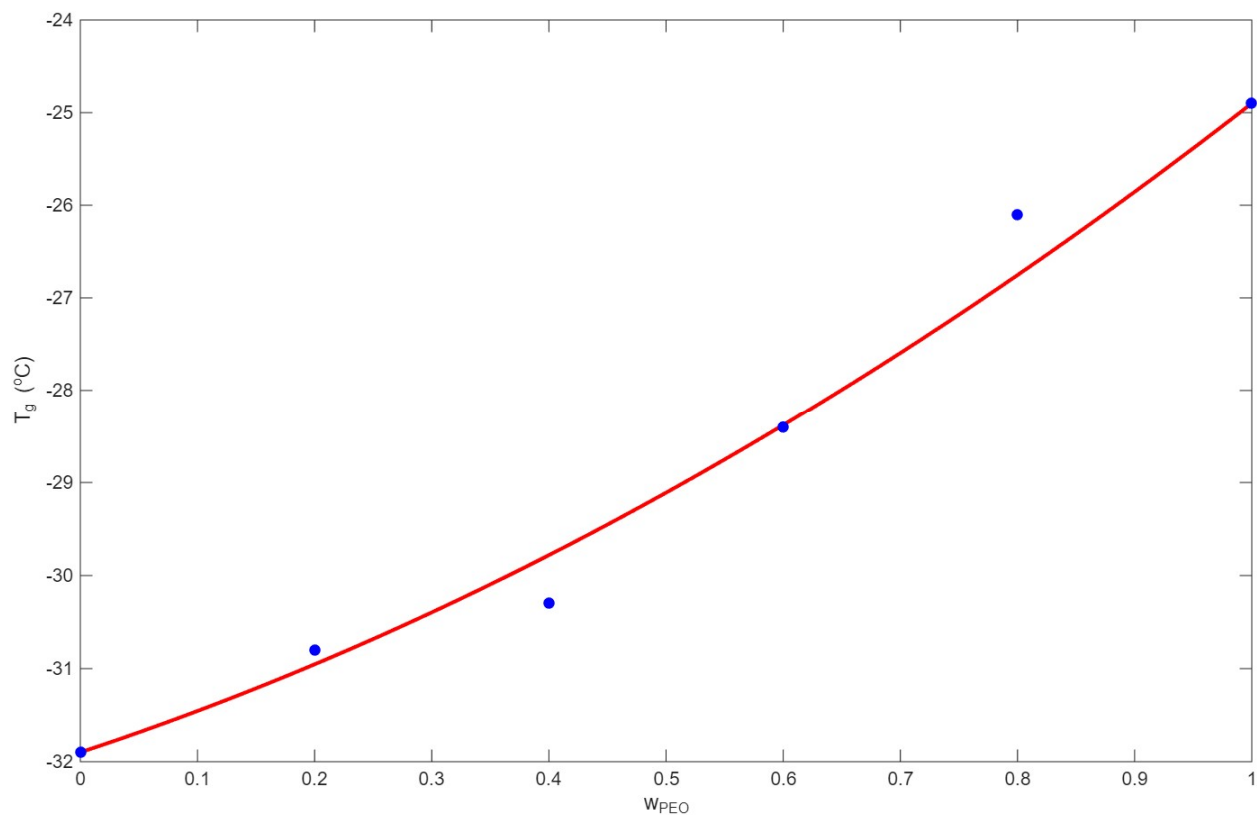

**Figure S1.**  $T_g$  data for PEO/PES/LiClO<sub>4</sub> blends at  $r = 0.1$  in blue dots and Kwei fit in red using  $T_g$  data from Kim et al.<sup>1</sup>

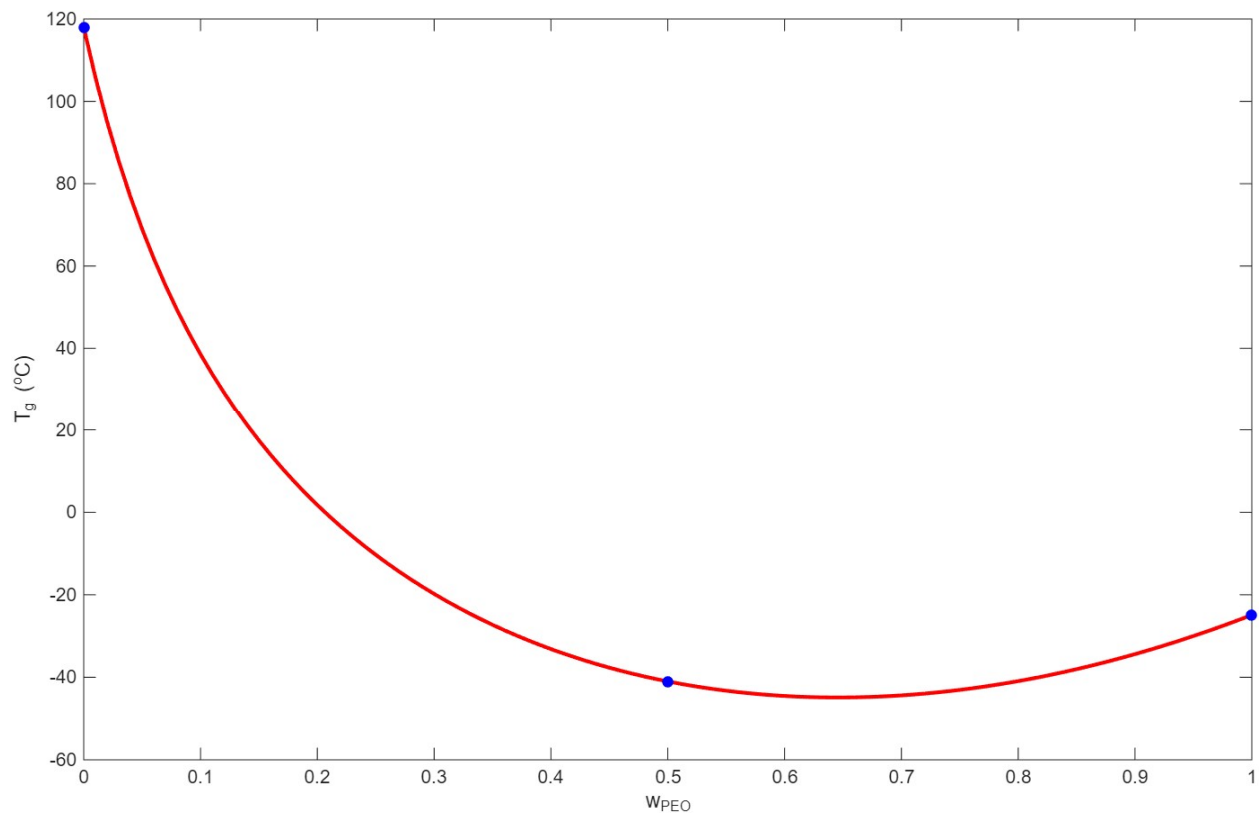

**Figure S2.**  $T_g$  data for PEO/PMMA/LiClO<sub>4</sub> blends at  $r = 0.1$  in blue dots and Kwei fit in red from Ghelichi et al. and PEO homopolymer data from Kim et al.<sup>1,2</sup>

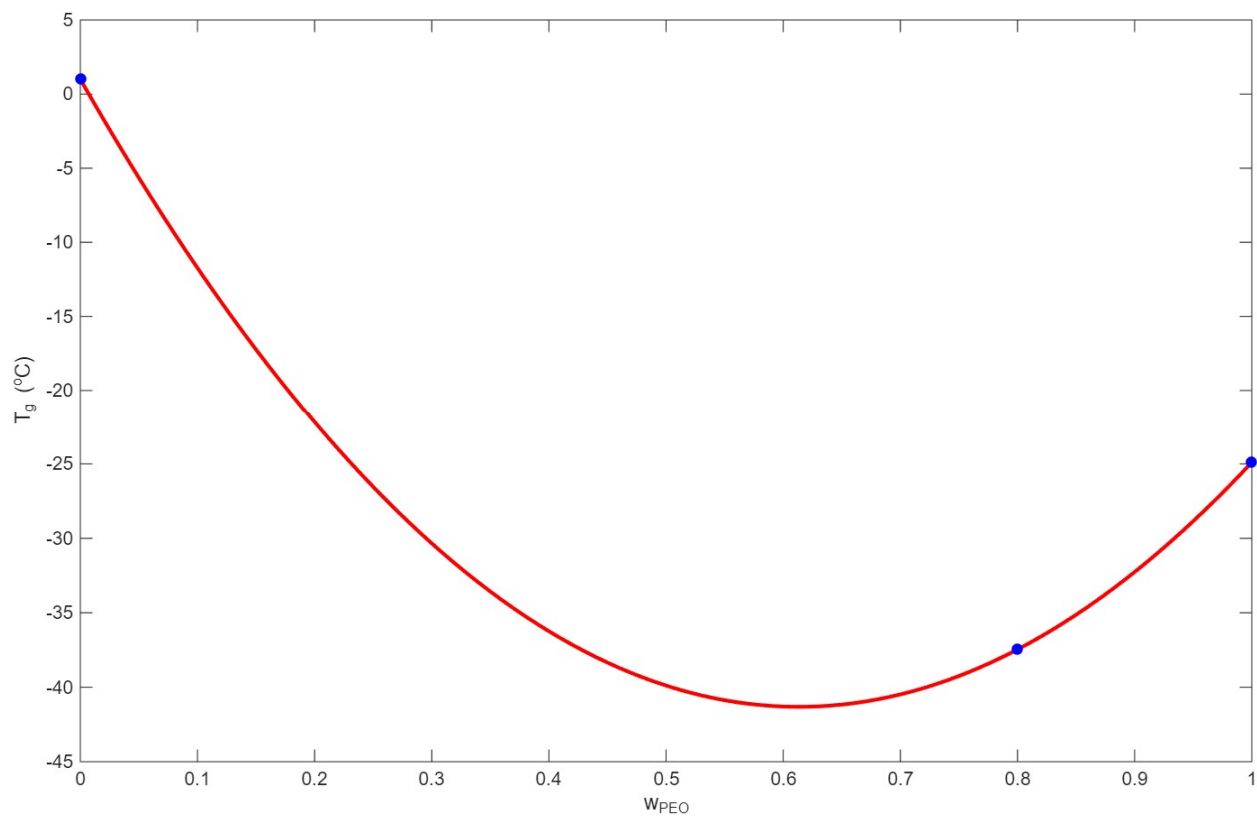

**Figure S3.**  $T_g$  data for PEO/PEI/LiClO<sub>4</sub> blends at  $r = 0.1$  in blue dots and Kwei fit in red from Tanaka et al. and PEO homopolymer data from Kim et al.<sup>1,3</sup>

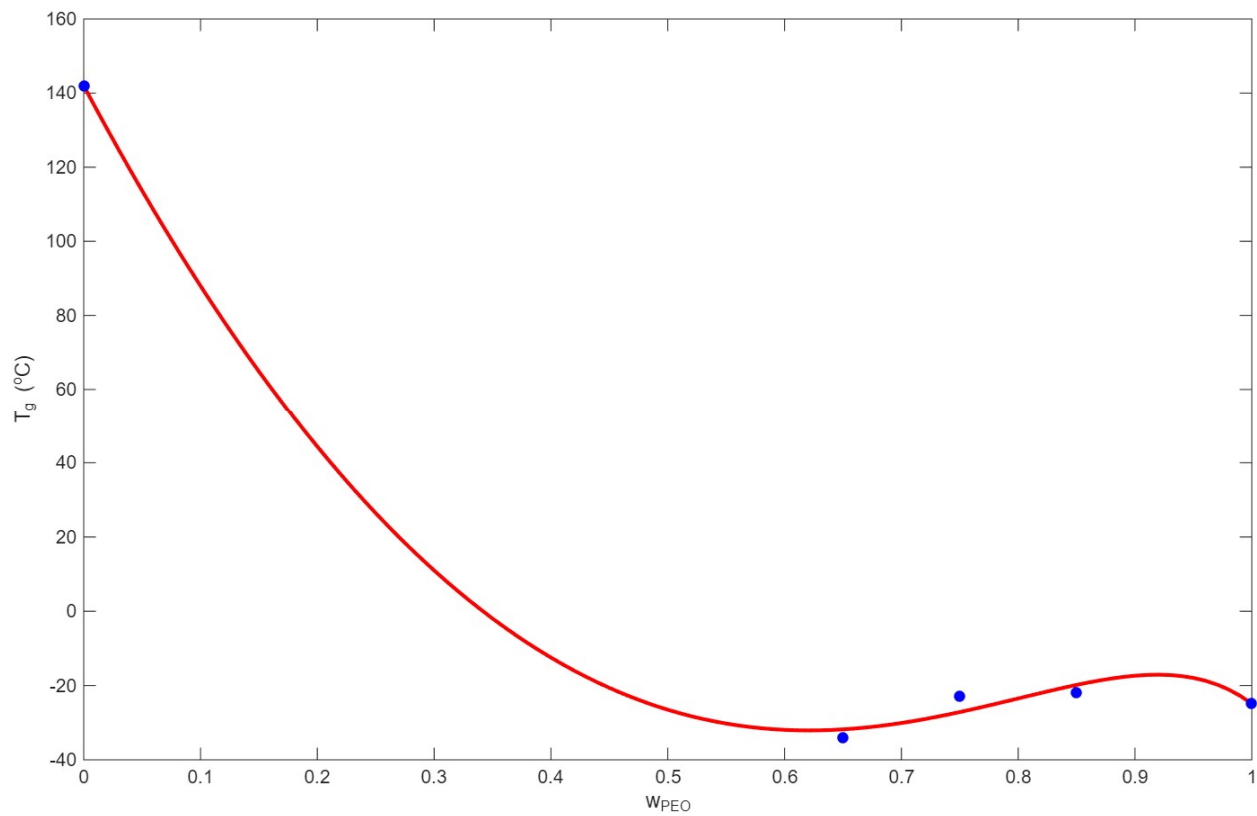

**Figure S4.**  $T_g$  data for PEO/P4VP/LiClO<sub>4</sub> blends at  $r = 0.1$  in blue dots and Kwei fit in red from Li & Kahn and PEO homopolymer data from Kim et al.<sup>1,4</sup>

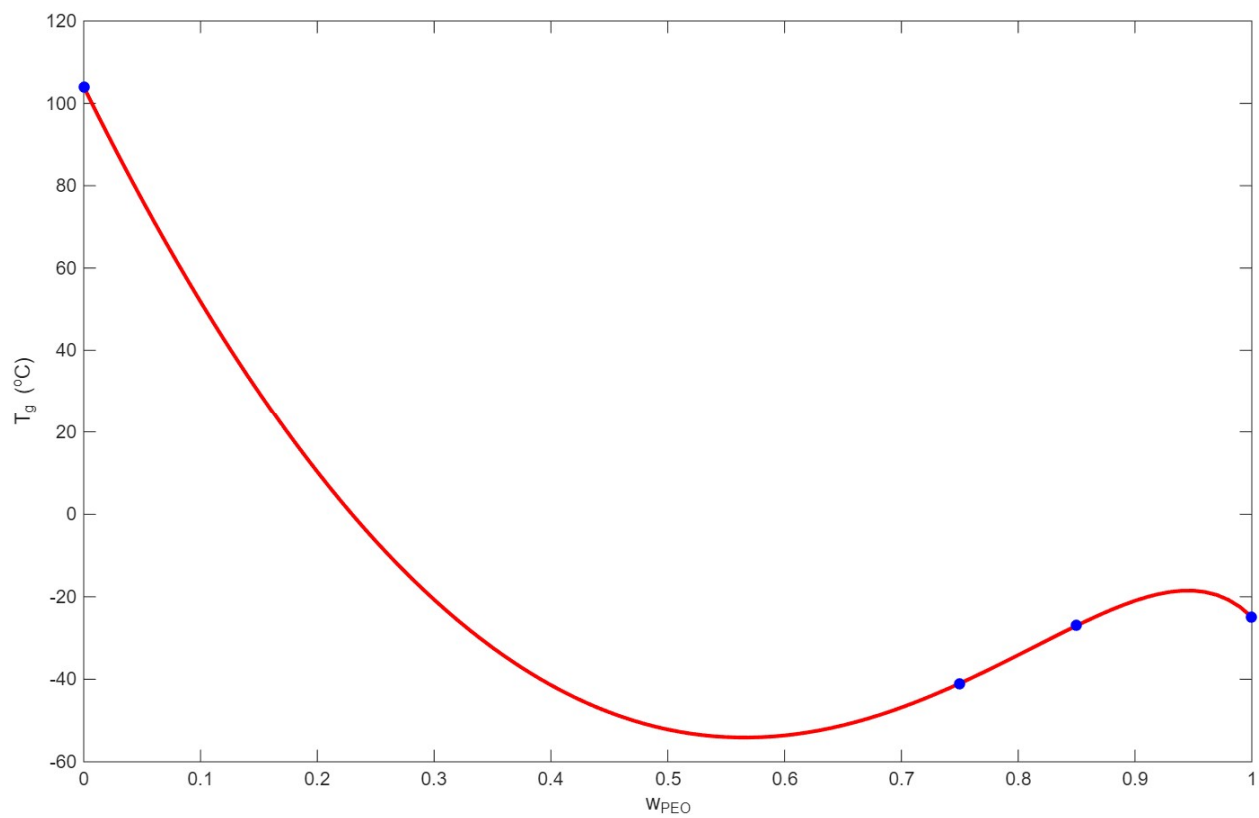

**Figure S5.**  $T_g$  data for PEO/P2VP/LiClO<sub>4</sub> blends at  $r = 0.1$  in blue dots and Kwei fit in red from Li & Kahn and PEO homopolymer data from Kim et al.<sup>1,4</sup>

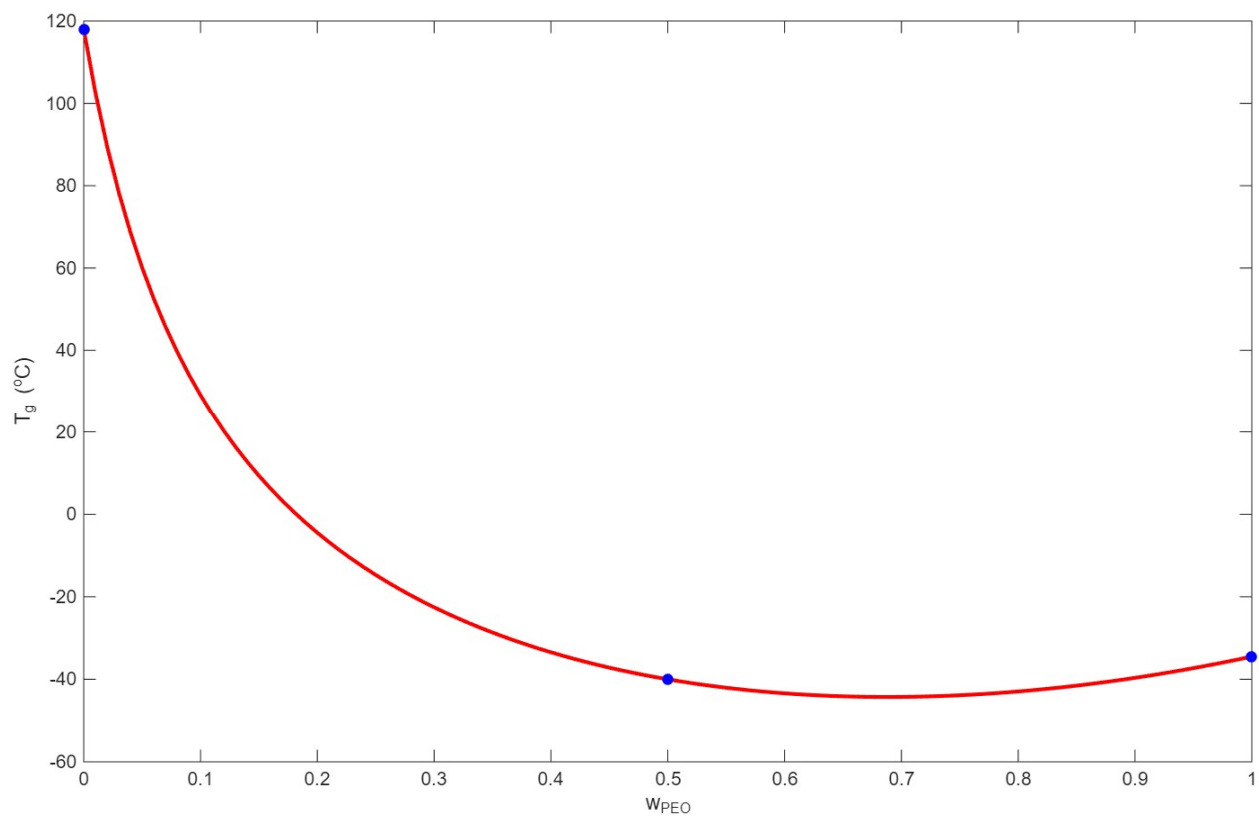

**Figure S6.**  $T_g$  data for PEO/PMMA/LiTFSI blends at  $r = 0.1$  in blue dots and Kwei fit in red from Sharon et al.<sup>5</sup>

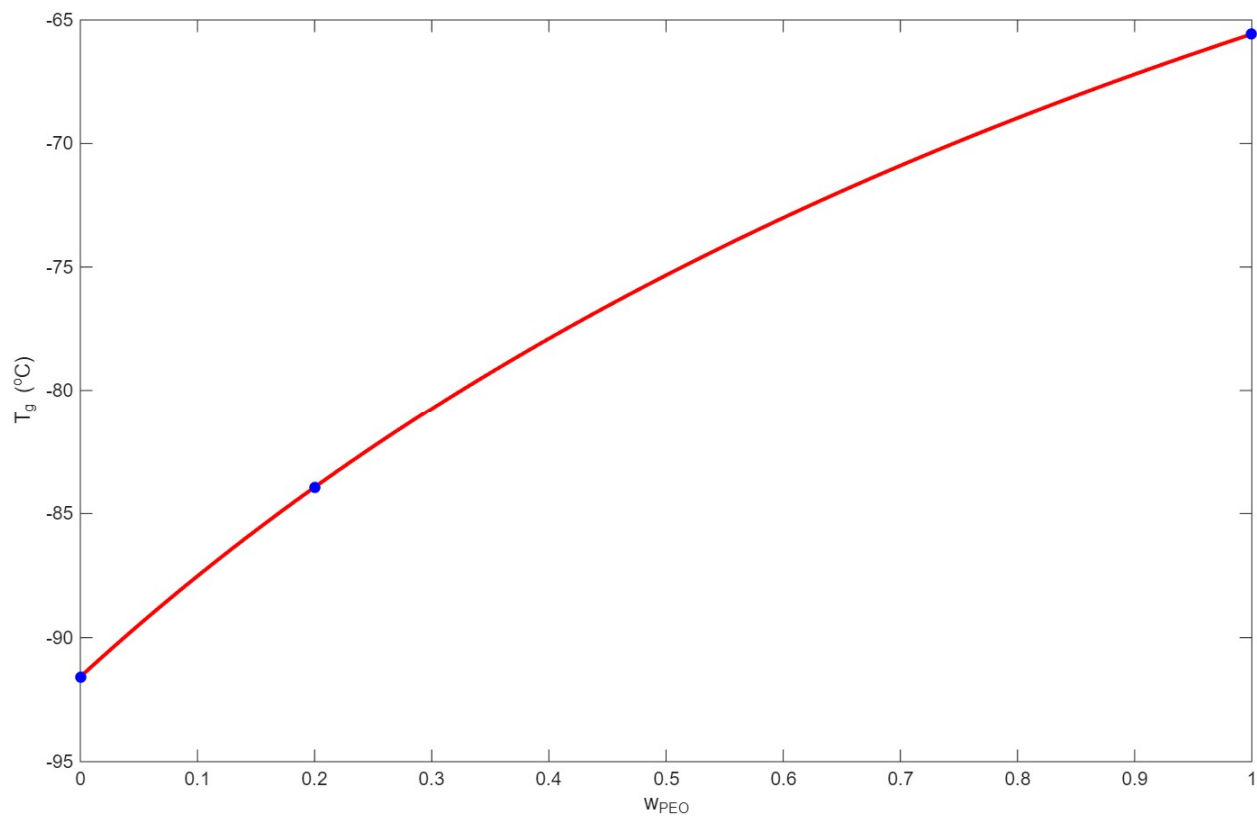

**Figure S7.**  $T_g$  data for PEO/PFPE/LiTFSI blends at  $r = 0.026$  in blue dots and Kwei fit in red from Wong et al.<sup>6</sup>

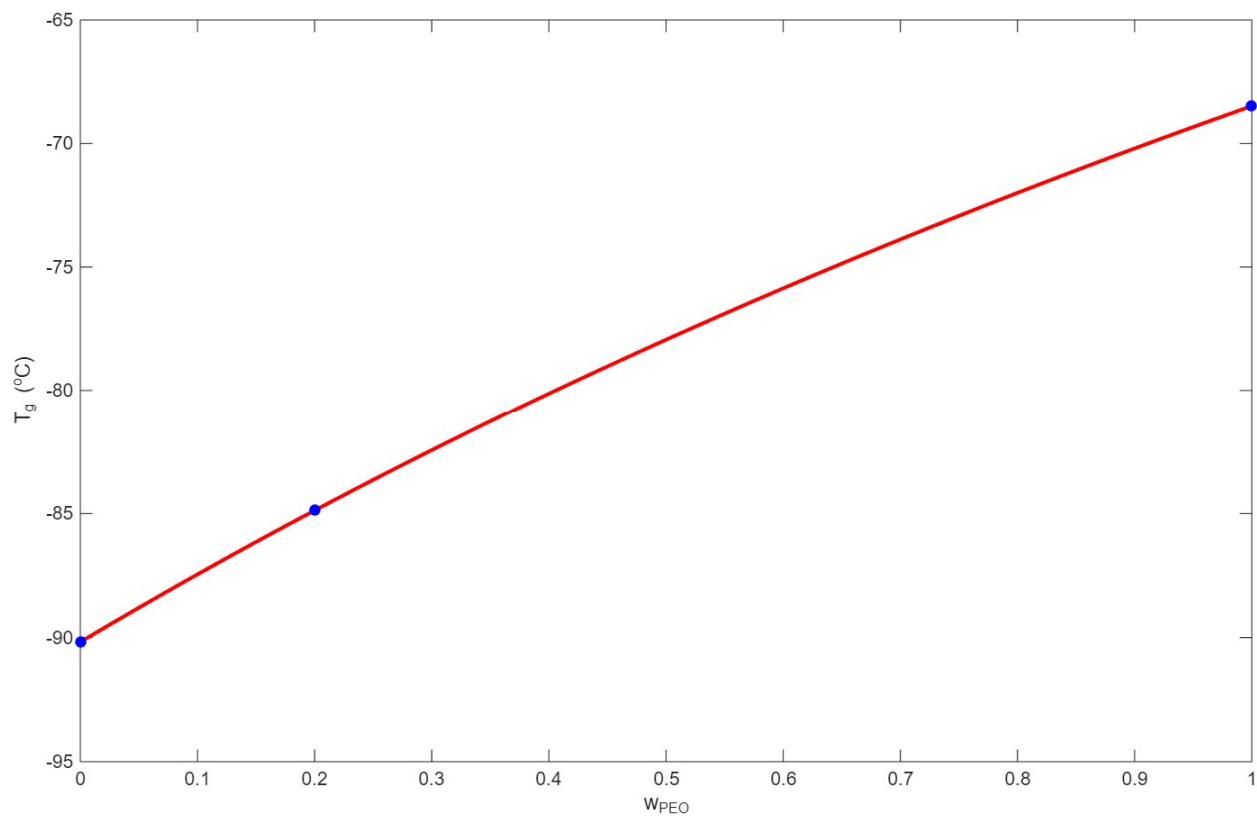

**Figure S8.**  $T_g$  data for PEO/PFPE/LiTFSI blends at  $r = 0.015$  in blue dots and Kwei fit in red from Wong et al.<sup>6</sup>

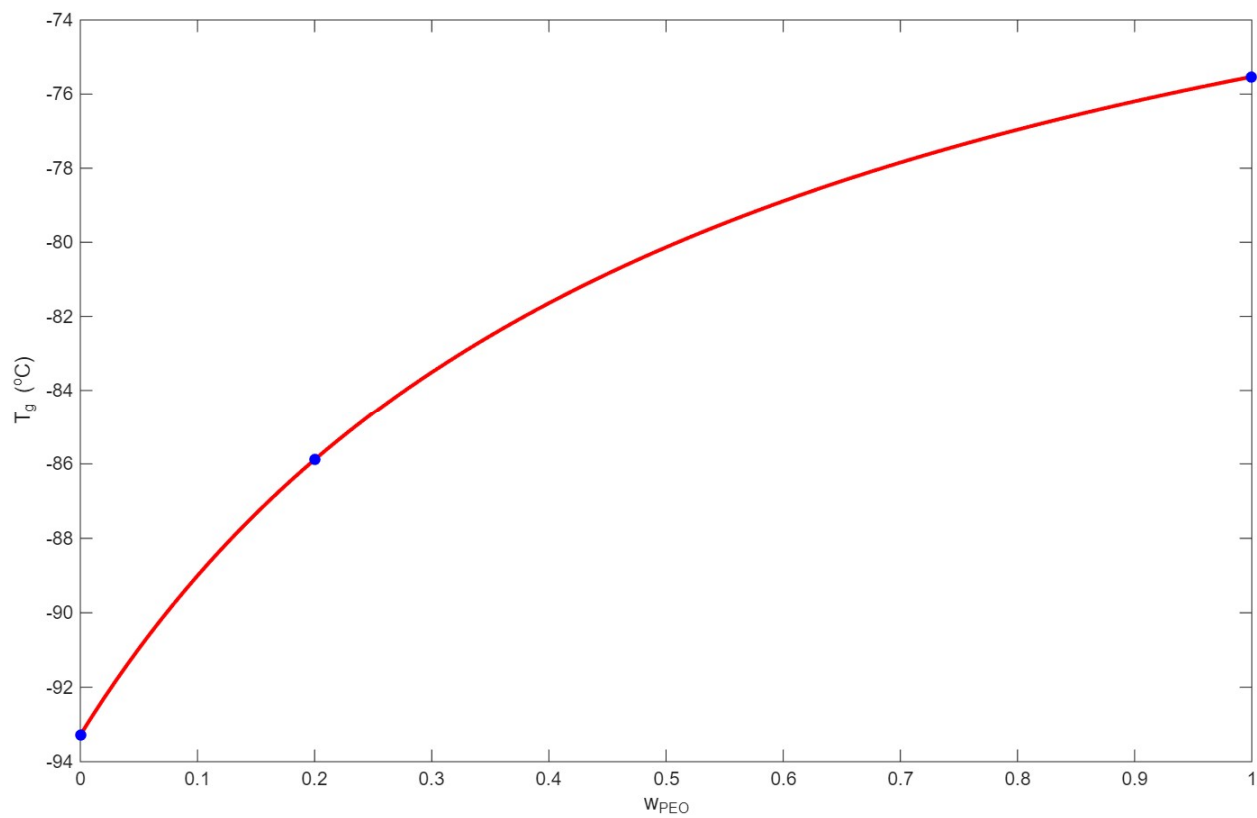

**Figure S9.**  $T_g$  data for PEO/PFPE blends at  $r = 0$  in blue dots and Kwei fit in red from Wong et al.<sup>6</sup>

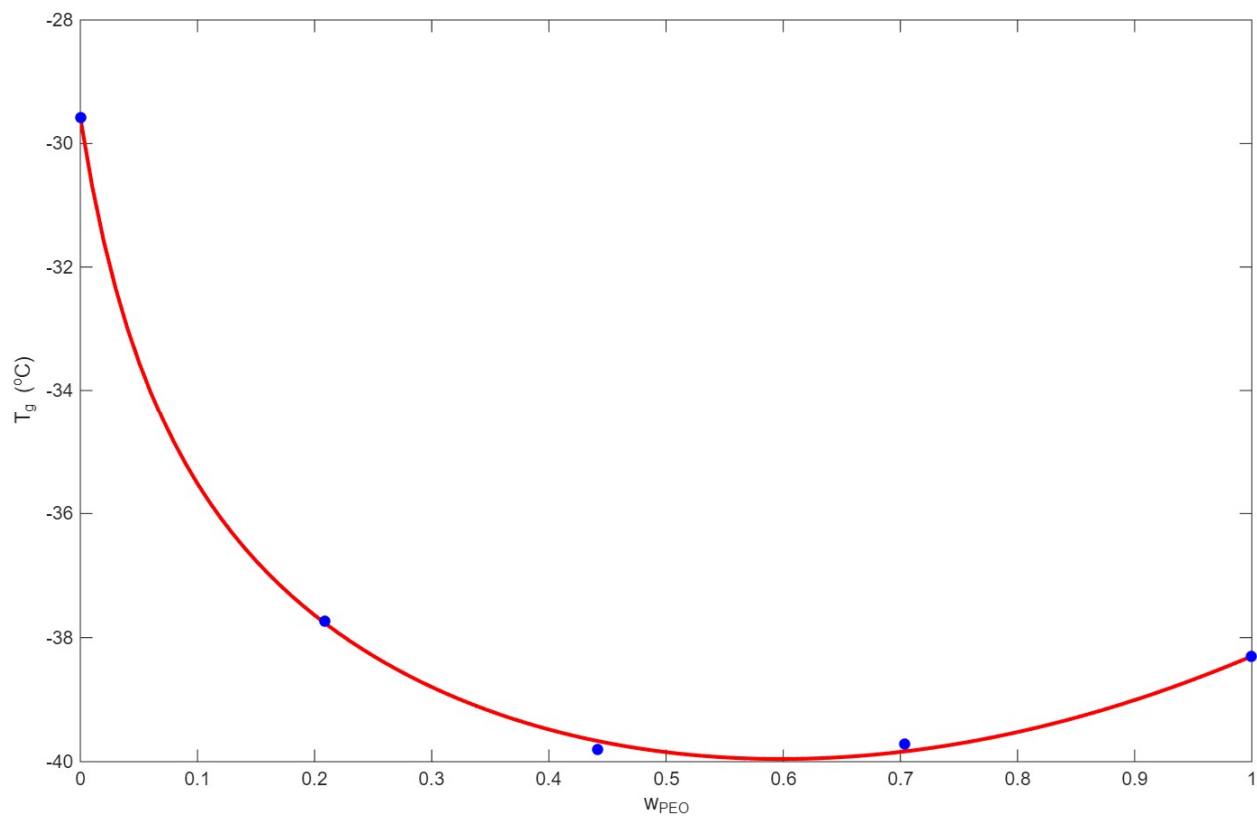

**Figure S10.**  $T_g$  data for PEO/POEM9/LiTFSI blends at  $r = 0.1$  in blue dots and Kwei fit in red from Gallmeyer et al.<sup>7</sup>

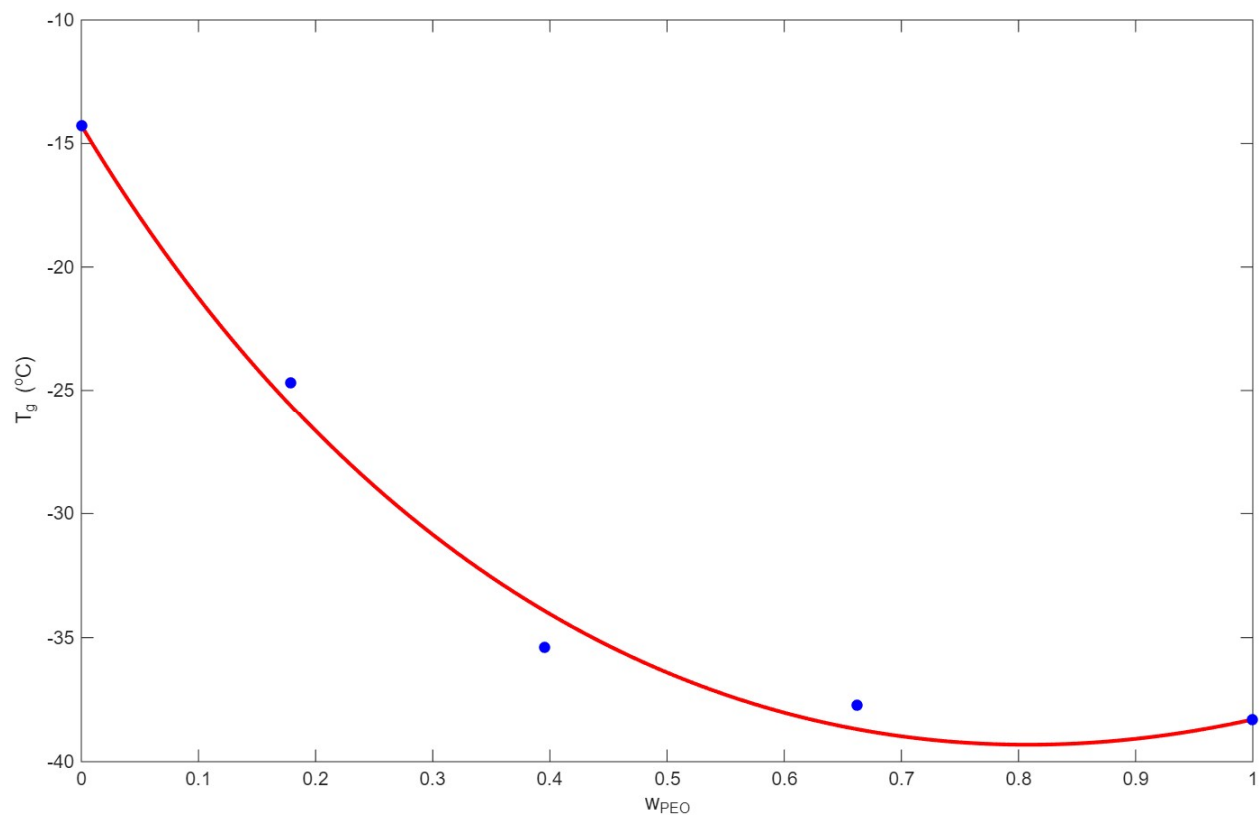

**Figure S11.**  $T_g$  data for PEO/POEM5/LiTFSI blends at  $r = 0.1$  in blue dots and Kwei fit in red from Gallmeyer et al.<sup>7</sup>

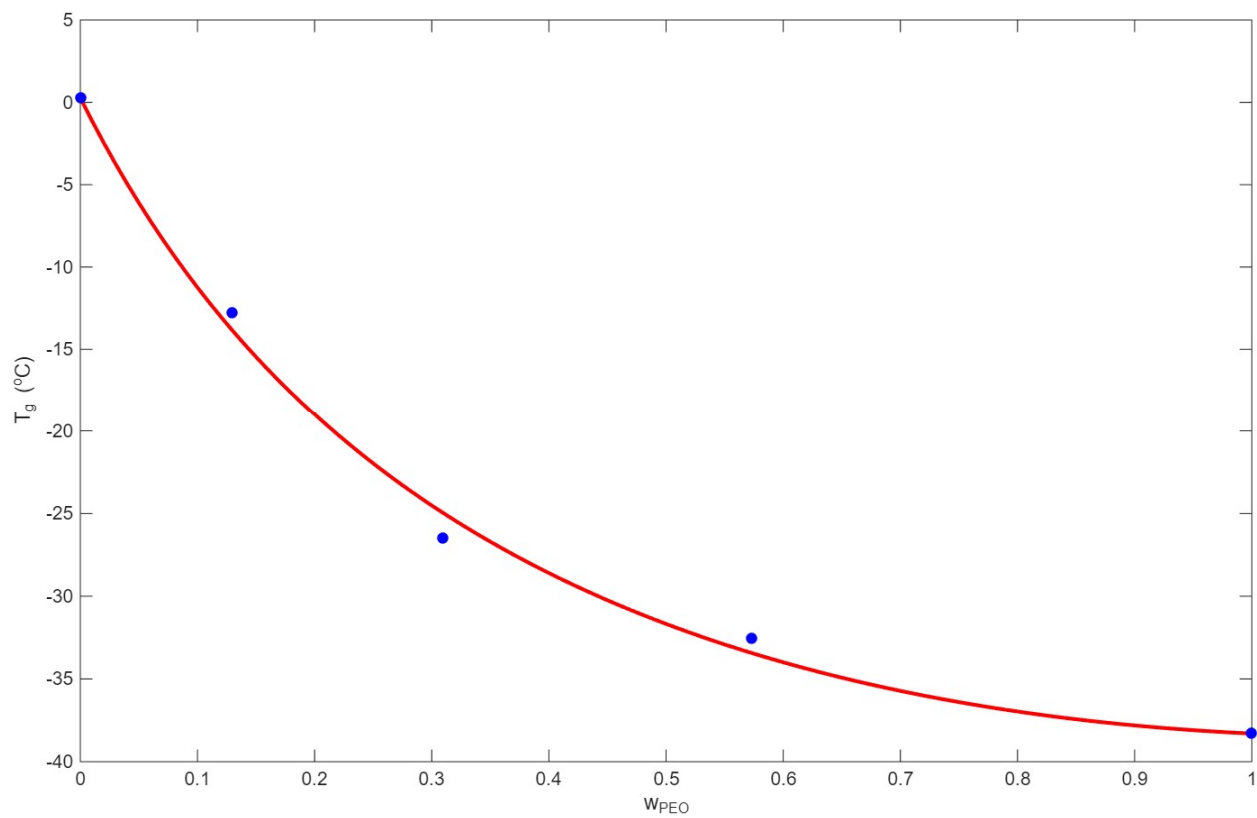

**Figure S12.**  $T_g$  data for PEO/POEM2/LiTFSI blends at  $r = 0.1$  in blue dots and Kwei fit in red from Gallmeyer et al.<sup>7</sup>

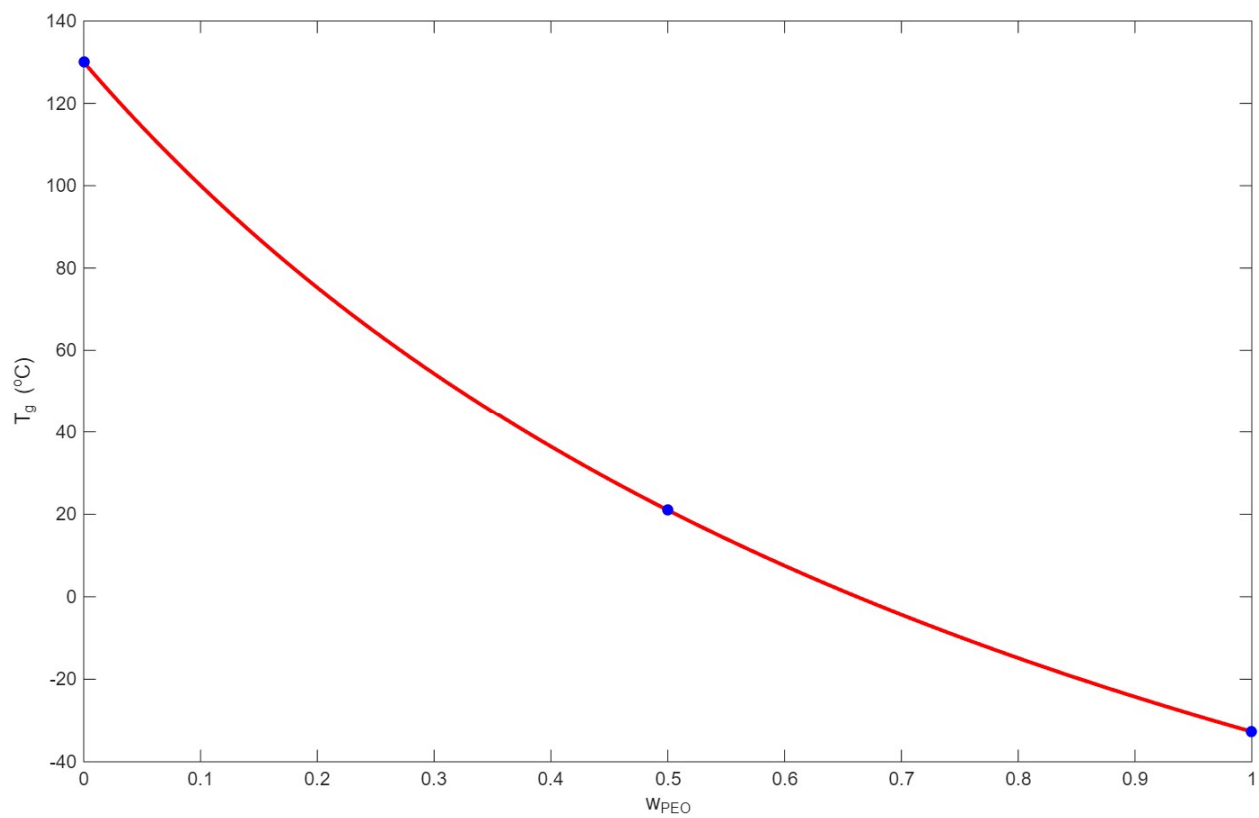

**Figure S13.**  $T_g$  data for PEO/PDTOA/LiTFSI blends at  $r = 0.06$  in blue dots and Kwei fit in red from Jo et al.<sup>8</sup>

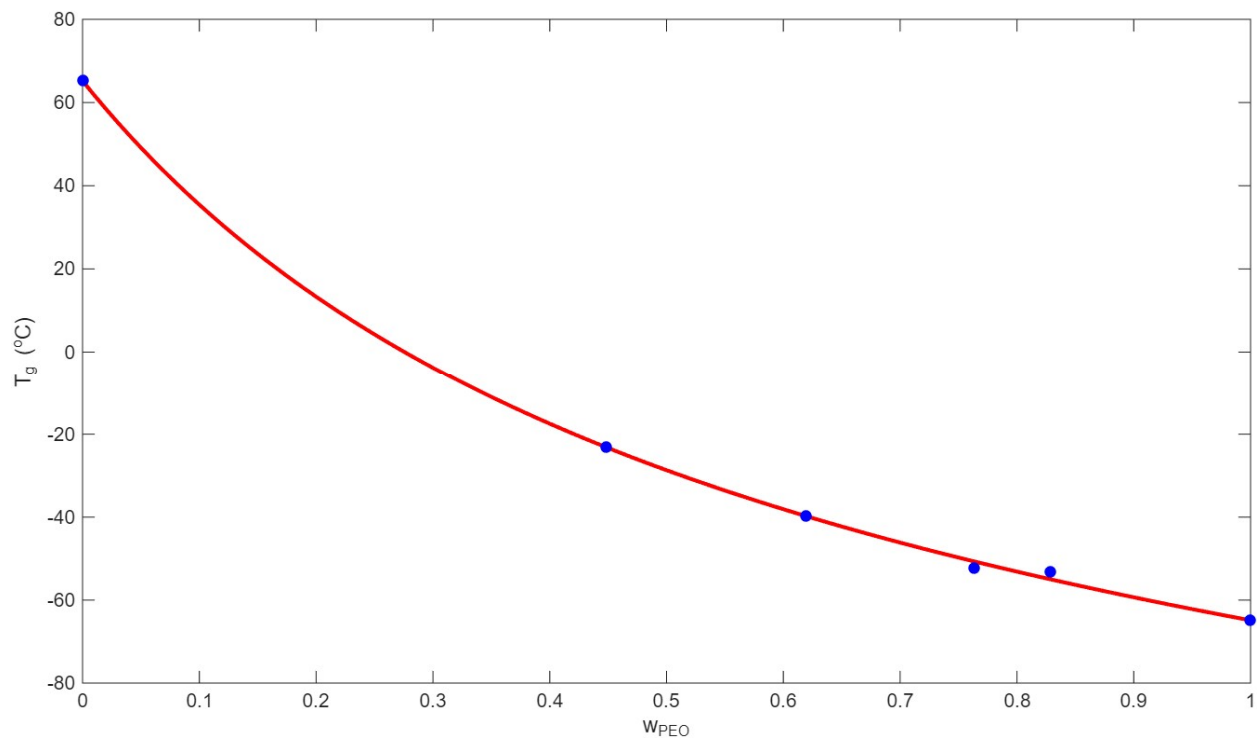

**Figure S14.**  $T_g$  data for POEM/PLiMTFSI blends with MW PLiMTFSI = 7 kDa in blue dots and Kwei fit in red from Yang & Epps.<sup>9</sup>

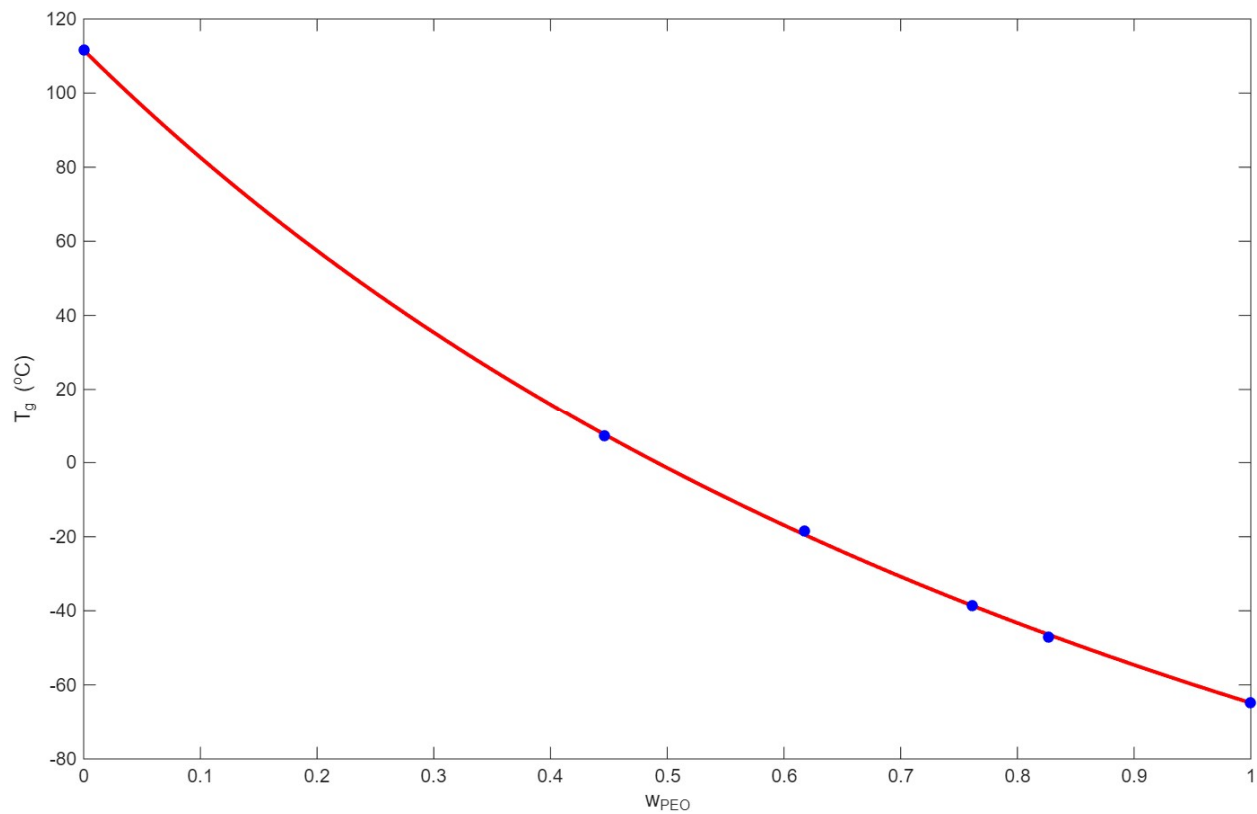

**Figure S14.**  $T_g$  data for POEM/PLiMTFSI blends with MW PLiMTFSI = 25 kDa in blue dots and Kwei fit in red from Yang & Epps.<sup>9</sup>

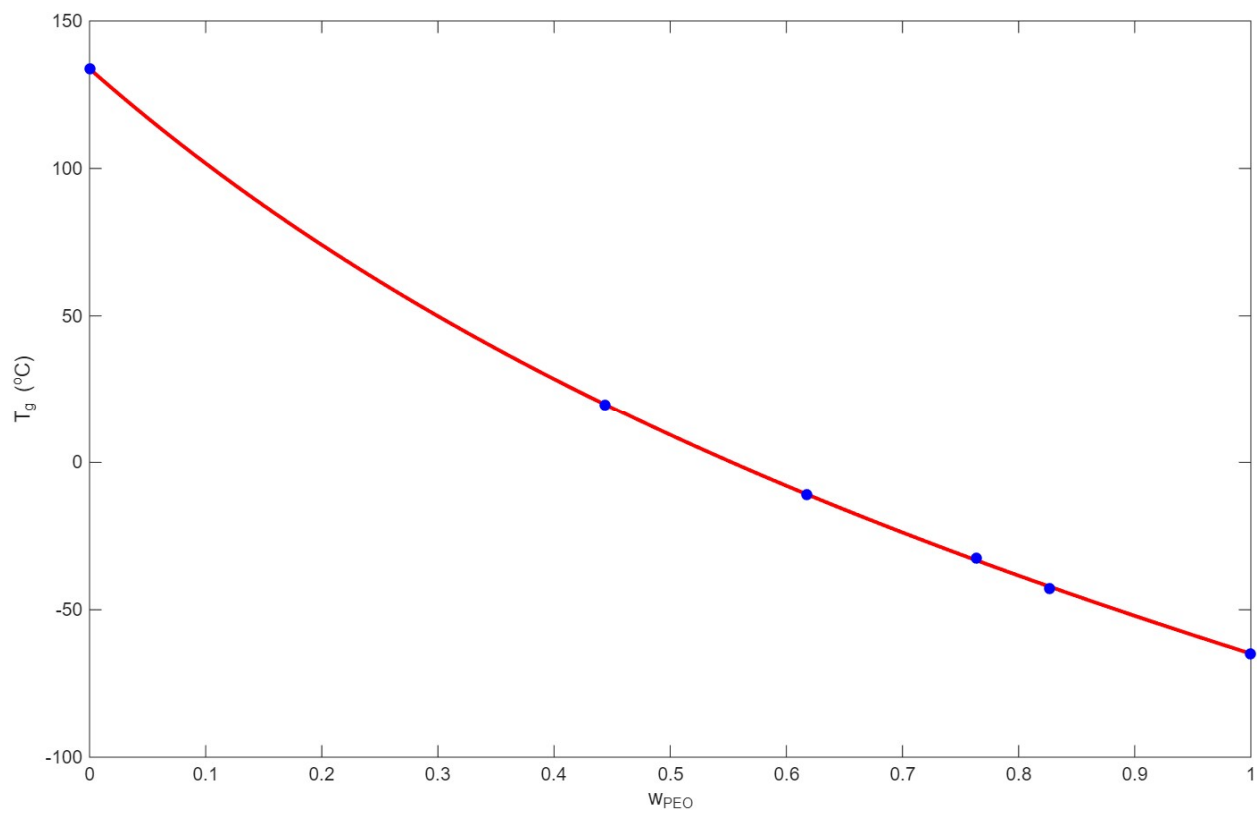

**Figure S16.**  $T_g$  data for POEM/PLiMTFSI blends with MW PLiMTFSI = 52 kDa in blue dots and Kwei fit in red from Yang & Epps.<sup>9</sup>

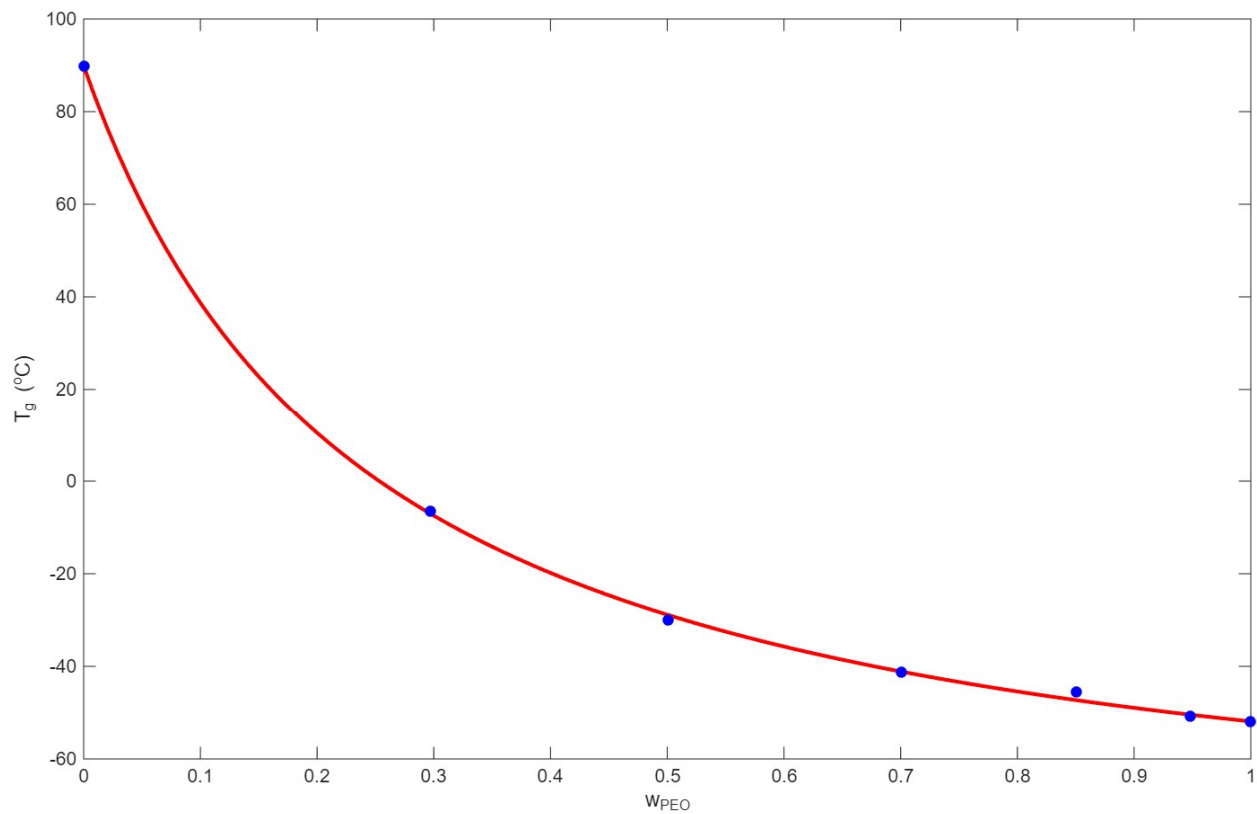

**Figure S17.**  $T_g$  data for PEO/PLiMTFSI blends MW PLiMTFSI = 5 kDa in blue dots and Kwei fit in red from Olmendo Martinez et al.<sup>10</sup>

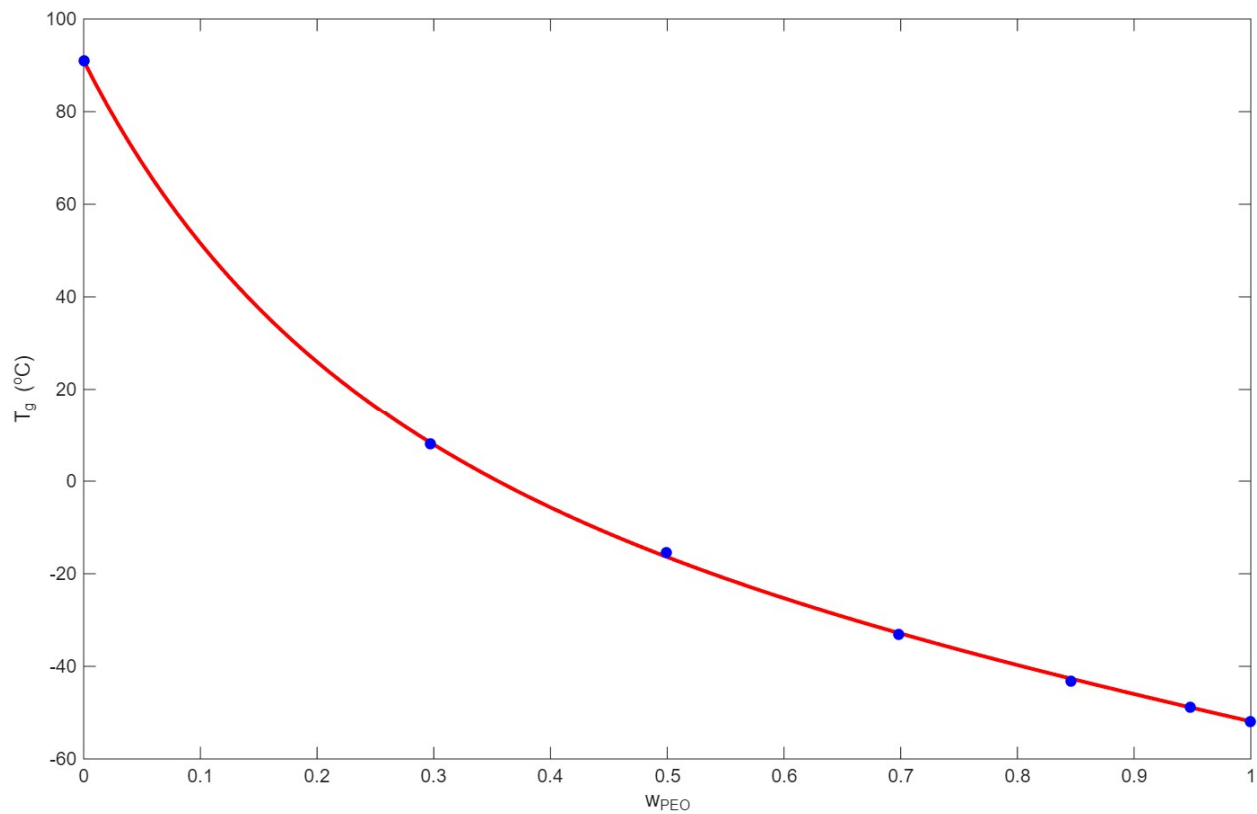

**Figure S18.**  $T_g$  data for PEO/PLiMTFSI blends with MW PLiMTFSI = 50 kDa in blue dots and Kwei fit in red from Olmendo Martinez et al.<sup>10</sup>

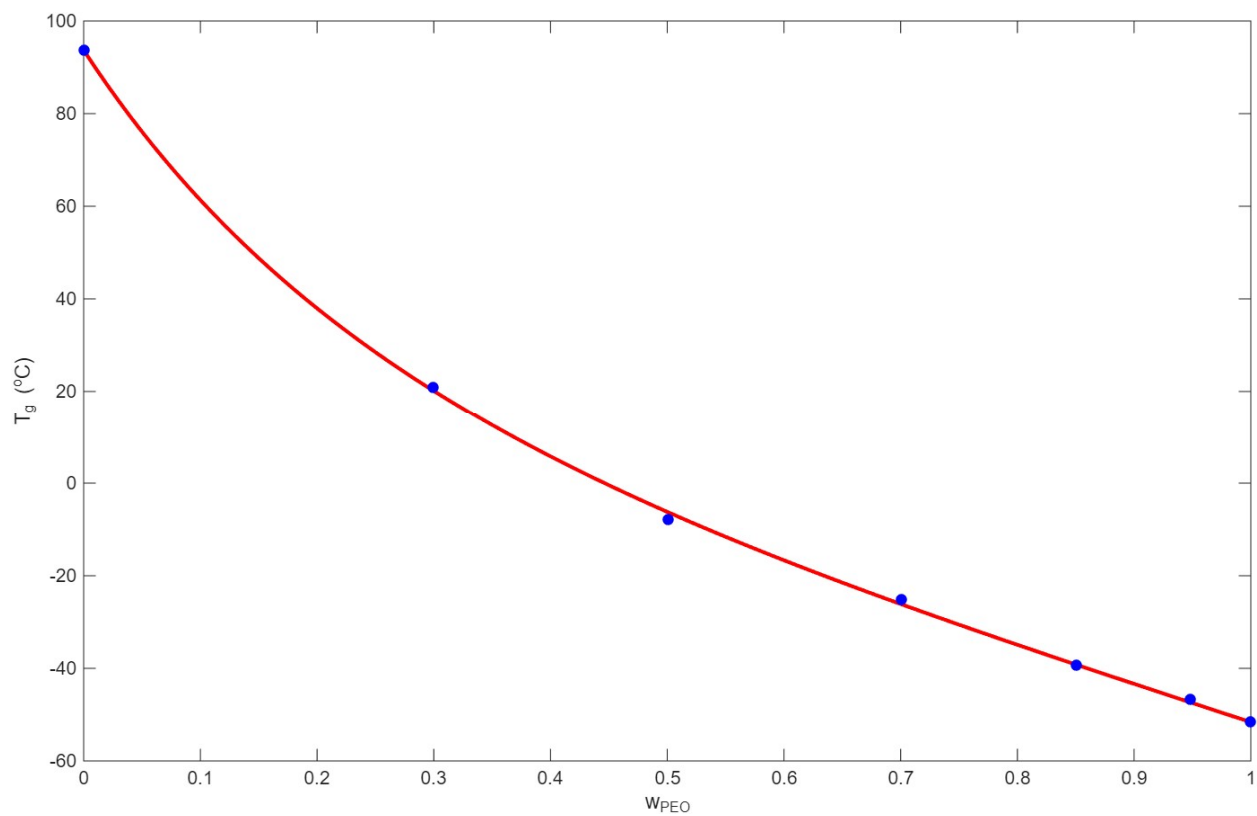

**Figure S19.**  $T_g$  data for PEO/PLiMTFSI blends at with  $MWP2 = 2000$  kDa in blue dots and Kwei fit in red from Olmendo Martinez et al.<sup>10</sup>

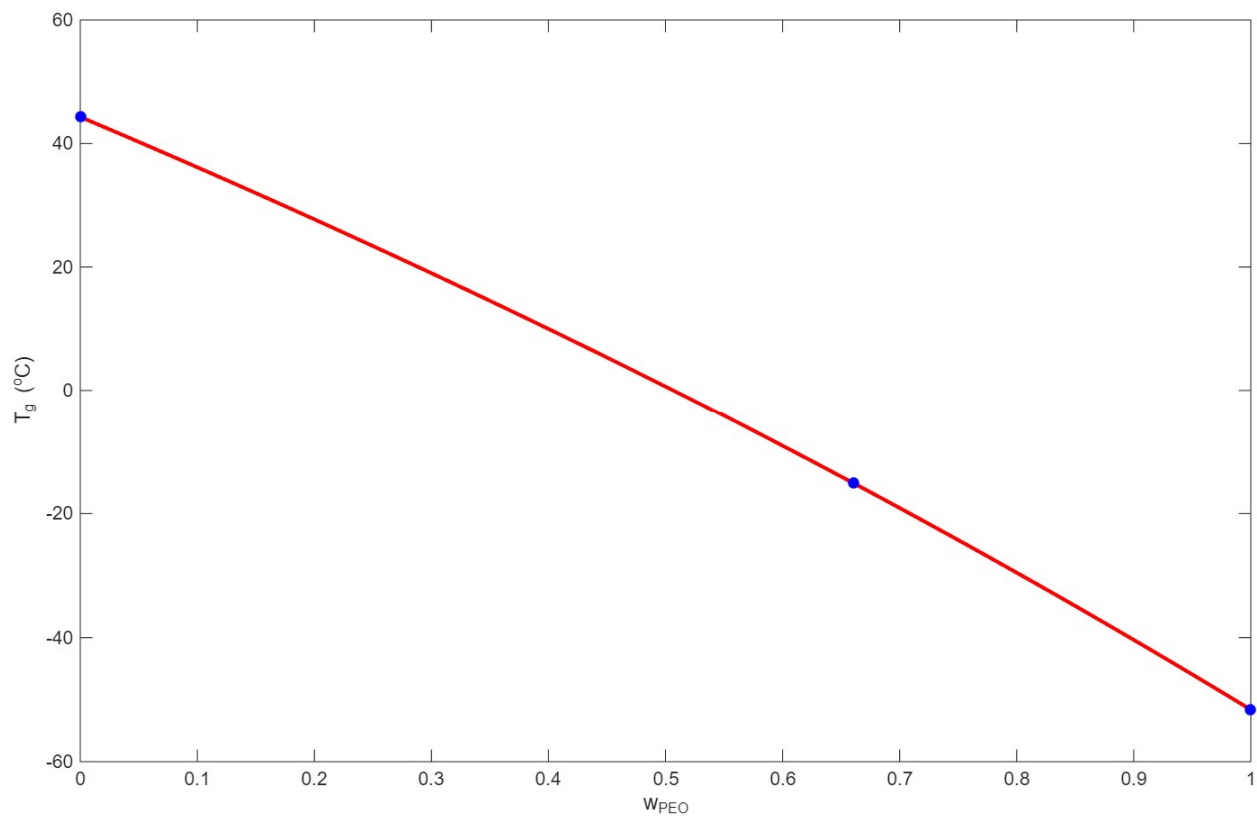

**Figure S20.**  $T_g$  data for PEO/PLiPSsTFSI blends in blue dots and Kwei fit in red from Ma et al.<sup>11</sup>

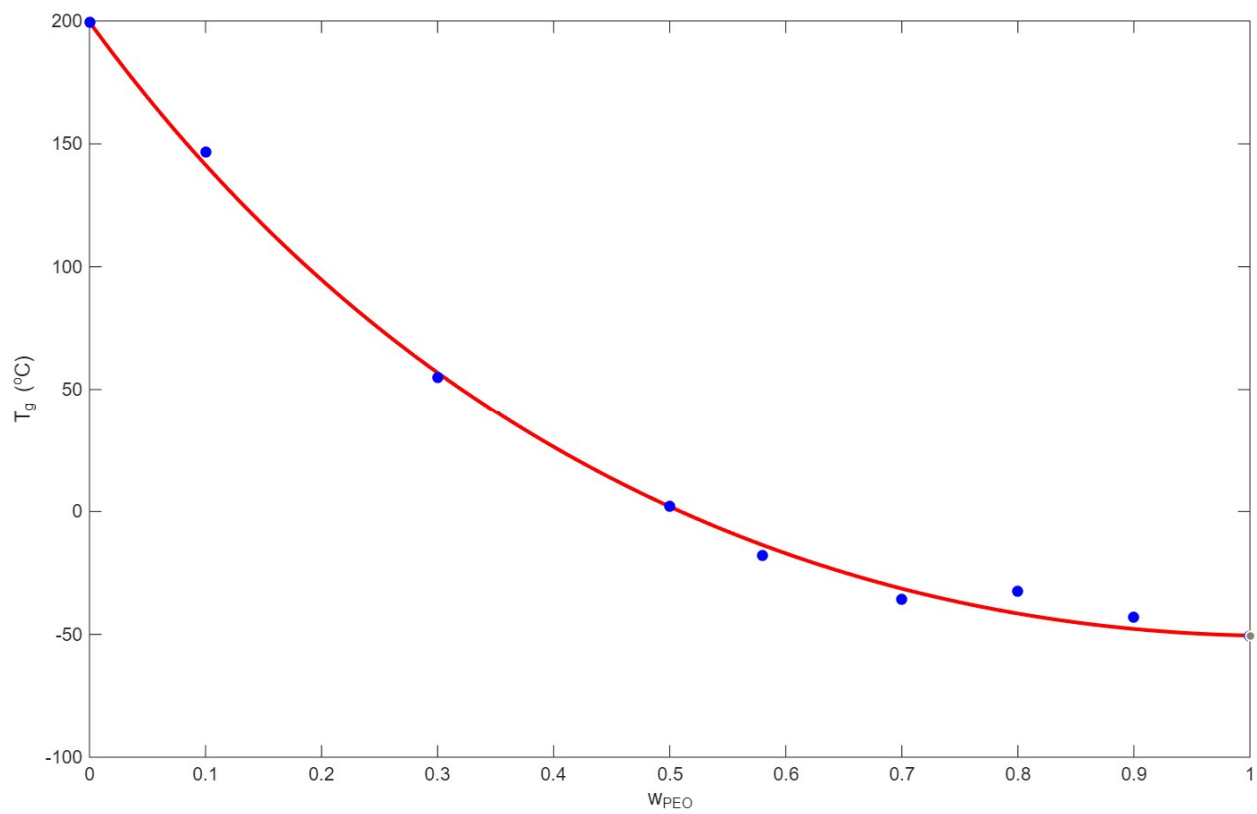

**Figure S21.**  $T_g$  data for PEO/ p5PhTFSI-Li with P5PhTFSI-Li MW = 32 kDa blends in blue dots and Kwei fit in red from Nguyen et al.<sup>12</sup>

**Table S1.** Activation Energy and Prefactor VTF Fits for PEO/P2/LiClO<sub>4</sub> Polymer Blend Electrolytes.

| Polymer 2<br>(P2)                                                                               | $M_{n,PEO}$<br>(kDa) | $M_{n,P2}$<br>(kDa) | $w_{PEO}$ | $r$               | $E_a$   | $A$   | ref                          |
|-------------------------------------------------------------------------------------------------|----------------------|---------------------|-----------|-------------------|---------|-------|------------------------------|
| 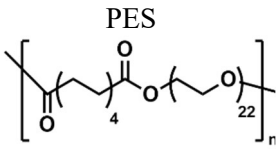 <p>PES</p>    | 5x10 <sup>3</sup>    | 1                   | 0         |                   | -       | -     | Kim et al. <sup>1</sup>      |
|                                                                                                 |                      |                     | 0.2       |                   | 2.102   | 6739  |                              |
|                                                                                                 |                      |                     | 0.4       | 0.1 <sup>a</sup>  | 2.530   | 7196  |                              |
|                                                                                                 |                      |                     | 0.6       |                   | 0.931   | 6670  |                              |
|                                                                                                 |                      |                     | 0.8       |                   | 0.183   | 6746  |                              |
|                                                                                                 |                      |                     | 1         |                   | 0.220   | 8204  |                              |
|                                                                                                 |                      |                     | 0.4       | 0.01 <sup>a</sup> | 5.820   | 11263 |                              |
|                                                                                                 |                      |                     | 0.4       | 0.02 <sup>a</sup> | 5.117   | 10427 |                              |
|                                                                                                 |                      |                     | 0.4       | 0.05 <sup>a</sup> | 3.456   | 9103  |                              |
| 0.4                                                                                             | 0.2 <sup>a</sup>     | 26.859              | 9241      |                   |         |       |                              |
|  <p>PMMA</p>   | 100                  | 120                 | 0.5       | 0.1               | -       | -     | Ghelichi et al. <sup>2</sup> |
|  <p>PEI</p>   | 70                   | 87                  | 0.8       | 0.07 <sup>a</sup> | 0.312   | 4467  | Tanaka et al. <sup>3</sup>   |
|                                                                                                 |                      |                     |           | 0.1 <sup>a</sup>  | 1.230   | 7354  |                              |
|                                                                                                 |                      |                     |           | 0.14 <sup>a</sup> | 11.074  | 11094 |                              |
|  <p>PEI</p>   | 10 <sup>3</sup>      | 87                  | 0.8       | 0.25 <sup>a</sup> | 234.501 | 18007 | Tanaka et al. <sup>3</sup>   |
|                                                                                                 |                      |                     |           | 0.07 <sup>a</sup> | 1.861   | 8379  |                              |
|                                                                                                 |                      |                     |           | 0.1 <sup>a</sup>  | 6.864   | 7916  |                              |
|  <p>P4VP</p> | 600                  | 50                  | 0.75      | 0.14 <sup>a</sup> | 46.860  | 11841 | Li & Khan <sup>4</sup>       |
|                                                                                                 |                      |                     |           | 0.25 <sup>a</sup> | 381.378 | 18794 |                              |
|                                                                                                 |                      |                     |           | 0.1               | 1.723   | 11189 |                              |
|  <p>P4VP</p> | 600                  | 50                  | 0.75      | 0.125             | 3.676   | 11954 | Li & Khan <sup>4</sup>       |
|                                                                                                 |                      |                     |           | 0.167             | 0.927   | 8587  |                              |
|                                                                                                 |                      |                     |           | 0.25              | 0.368   | 7792  |                              |
|  <p>P2VP</p> | 600                  | 200                 | 0.85      | 0.04              | 296.528 | 15425 | Li & Khan <sup>4</sup>       |
|                                                                                                 |                      |                     |           | 0.05              | 81.530  | 12896 |                              |
|                                                                                                 |                      |                     |           | 0.07              | 144.758 | 13679 |                              |
|                                                                                                 |                      |                     |           | 0.1               | 77.755  | 11491 |                              |
|                                                                                                 |                      |                     |           | 0.2               | 10.003  | 9175  |                              |

<sup>a</sup> indicates that both polymers participate in ion solvation and are included in the  $r$  calculations

**Table S2.** Activation Energy and Prefactor VTF Fits for PEO/P2/LiTFSI Polymer Blend Electrolytes.

| Polymer 2<br>(P2)                                                                           | $M_{n,PEO}$<br>(kDa) | $M_{n,P2}$<br>(kDa) | $w_{PEO}$ | $r$                | $E_a$            | $A$    | ref                           |
|---------------------------------------------------------------------------------------------|----------------------|---------------------|-----------|--------------------|------------------|--------|-------------------------------|
| PMMA<br>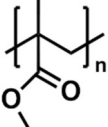   | 10                   | 11                  | 0.5       | 0.05               | 3.374            | 11700  | Sharon et al. <sup>5</sup>    |
| PFPE<br>   | 0.4                  | 1                   | 0.2       | 0.026 <sup>a</sup> | 4.343            | 10453  | Wong et al. <sup>6</sup>      |
|                                                                                             | 0.4                  | 1                   | 0.2       | 0.015 <sup>a</sup> | -                | -      |                               |
|                                                                                             | 0.4                  | 1                   | 0.2       | 0                  | -                | -      |                               |
| POEMX<br>  | POEM9                | 30                  | 5.8       | 0.44               | 0.1 <sup>a</sup> | 11.854 | Gallmeyer et al. <sup>7</sup> |
|                                                                                             | POEM5                | 30                  | 7.3       | 0.40               | 0.1 <sup>a</sup> | 12.284 |                               |
|                                                                                             | POEM2                | 30                  | 8.2       | 0.31               | 0.1 <sup>a</sup> | 4.710  |                               |
| PDTOA<br> | 5                    | 6.5                 | 0.5       | 0.06               | 0.547            | 3613   | Jo et al. <sup>8</sup>        |

<sup>a</sup> indicates that both polymers participate in ion solvation and are included in the  $r$  calculations

**Table 3** Activation Energy and Prefactor VTF Fits for PEO-Based Single-Ion Conducting Polymer Blend Electrolytes

| Polymer 2                                                                           | EO Polymer | $M_{n,1}$ (kDa) | $M_{n,2}$ (kDa) | $w_{P1}$ | $r$   | $E_a$  | $A$   | ref                                     |       |  |  |  |
|-------------------------------------------------------------------------------------|------------|-----------------|-----------------|----------|-------|--------|-------|-----------------------------------------|-------|--|--|--|
| 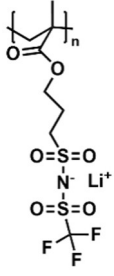   | POEM       | 5.9             | 25              | 0.44     | 0.2   | -      | -     | Yang & Epps <sup>9</sup>                |       |  |  |  |
|                                                                                     |            |                 |                 | 0.62     | 0.1   | -      | -     |                                         |       |  |  |  |
|                                                                                     |            |                 |                 | 0.76     | 0.05  | 31.676 | 15881 |                                         |       |  |  |  |
|                                                                                     |            |                 |                 | 0.83     | 0.03  | 0.133  | 11173 |                                         |       |  |  |  |
|                                                                                     |            |                 | 0.44            | 0.2      | -     | -      | 7     |                                         |       |  |  |  |
|                                                                                     |            |                 | 0.62            | 0.1      | -     | -      |       |                                         |       |  |  |  |
|                                                                                     |            |                 | 0.76            | 0.05     | -     | -      |       |                                         |       |  |  |  |
|                                                                                     |            |                 | 0.83            | 0.03     | -     | -      |       |                                         |       |  |  |  |
|                                                                                     |            |                 | 0.44            | 0.2      | 0.266 | 9703   |       |                                         |       |  |  |  |
|                                                                                     |            |                 | 0.62            | 0.1      | 1.451 | 11751  |       |                                         |       |  |  |  |
|                                                                                     |            |                 | 0.76            | 0.05     | 1.123 | 10042  |       |                                         |       |  |  |  |
|                                                                                     |            |                 | 0.83            | 0.03     | 0.292 | 10344  |       |                                         |       |  |  |  |
|  | PEO        | 100             | 50              | 0.30     | 0.298 | 1.210  | 6976  | Olmedo<br>Martinez et al. <sup>10</sup> |       |  |  |  |
|                                                                                     |            |                 |                 | 0.50     | 0.128 | 3.311  | 10992 |                                         |       |  |  |  |
|                                                                                     |            |                 |                 | 0.70     | 0.055 | 0.804  | 8257  |                                         |       |  |  |  |
|                                                                                     |            |                 |                 | 0.85     | 0.022 | 0.135  | 6713  |                                         |       |  |  |  |
|                                                                                     |            |                 |                 | 0.95     | 0.006 | -      | -     |                                         |       |  |  |  |
|                                                                                     |            |                 |                 | 0.30     | 0.298 | 0.064  | 5058  |                                         |       |  |  |  |
|                                                                                     |            |                 |                 | 0.50     | 0.128 | 1.157  | 6374  |                                         |       |  |  |  |
|                                                                                     |            |                 |                 | 0.70     | 0.055 | 1.235  | 7651  |                                         |       |  |  |  |
|                                                                                     |            |                 |                 | 0.85     | 0.022 | 0.182  | 6651  |                                         |       |  |  |  |
|                                                                                     |            |                 |                 | 0.95     | 0.006 | -      | -     |                                         | >2000 |  |  |  |
|                                                                                     |            |                 |                 | 0.30     | 0.298 | 0.052  | 8572  |                                         |       |  |  |  |
|                                                                                     |            |                 |                 | 0.50     | 0.128 | 0.031  | 4128  |                                         |       |  |  |  |
| 0.70                                                                                | 0.055      | 0.182           | 6622            |          |       |        |       |                                         |       |  |  |  |
| 0.85                                                                                | 0.022      | 0.008           | 3324            |          |       |        |       |                                         |       |  |  |  |
| 0.95                                                                                | 0.006      | -               | -               |          |       |        |       |                                         |       |  |  |  |
| P5PhTFSI-Li                                                                         | PEO        | 20              | 32              | 0.3      | 0.29  | 0.006  | 3961  | Nguyen et al. <sup>12</sup>             |       |  |  |  |
|                                                                                     |            |                 |                 | 0.5      | 0.13  | 98.298 | 11614 |                                         |       |  |  |  |
|                                                                                     |            |                 |                 | 0.58     | 0.087 | 0.187  | 7787  |                                         |       |  |  |  |
|                                                                                     |            |                 |                 | 0.7      | 0.051 | 3.690  | 11039 |                                         |       |  |  |  |
|                                                                                     |            |                 |                 | 0.9      | 0.013 | 0.038  | 6340  |                                         |       |  |  |  |

---

LiPSsTFSI

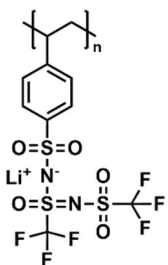

PEO

-

20

0.66

0.05

1.269

7823

Ma et al.<sup>11</sup>

---

**Table S4.**  $T_g$  for P2 species considered in this study

| P2          | Mn<br>(kDa)       | Salt               | $r$   | $T_g$<br>(°C) | Reference                            |
|-------------|-------------------|--------------------|-------|---------------|--------------------------------------|
| PES         | 5x10 <sup>3</sup> | LiClO <sub>4</sub> | 0.1   | -31.9         | Kim <sup>1</sup>                     |
| PMMA        | 120               | LiClO <sub>4</sub> | 0     | 114           | Ghelichi <sup>2</sup>                |
| PEI         | 87                | LiClO <sub>4</sub> | 0.1   | 1             | Tanaka <sup>3,13</sup>               |
| P2VP        | 50                | LiClO <sub>4</sub> | 0     | 104           | Li & Khan <sup>4</sup>               |
| P2VP        | 200               | LiClO <sub>4</sub> | 0     | 142           | Li & Khan <sup>4</sup>               |
| PMMA        | 11                | LiTFSI             | 0     | 118           | Sharon et al. <sup>5</sup>           |
| PFPE        | 1                 | LiTFSI             | 0     | -93.2         | Wong et al. <sup>6</sup>             |
| PFPE        | 1                 | LiTFSI             | 0.015 | -90.2         | Wong et al. <sup>6</sup>             |
| PFPE        | 1                 | LiTFSI             | 0.026 | -91.6         | Wong et al. <sup>6</sup>             |
| POEM9       | 5.8               | LiTFSI             | 0.1   | -29.6         | Gallmeyer et al. <sup>7</sup>        |
| POEM5       | 7.3               | LiTFSI             | 0.1   | -14.3         | Gallmeyer et al. <sup>7</sup>        |
| POEM2       | 8.2               | LiTFSI             | 0.1   | 0.3           | Gallmeyer et al. <sup>7</sup>        |
| PDTOA       | 6.5               | LiTFSI             | 0     | 130           | Jo et al. <sup>8</sup>               |
| PLiMTFSI    | 7                 | -                  | -     | 199.5         | Yang & Epps <sup>9</sup>             |
| PLiMTFSI    | 16                | -                  | -     | 94.5          | Yang & Epps <sup>9</sup>             |
| PLiMTFSI    | 25                | -                  | -     | 111.6         | Yang & Epps <sup>9</sup>             |
| PLiMTFSI    | 52                | -                  | -     | 133.8         | Yang & Epps <sup>9</sup>             |
| PLiMTFSI    | 5                 | -                  | -     | 89.9          | Olmedo Martinez et al. <sup>10</sup> |
| PLiMTFSI    | 50                | -                  | -     | 91.0          | Olmedo Martinez et al. <sup>10</sup> |
| PLiMTFSI    | 2k                | -                  | -     | 93.7          | Olmedo Martinez et al. <sup>10</sup> |
| P5PhTFSI-Li | 32                | -                  | -     | 199.6         | Nguyen et al. <sup>12</sup>          |
| LiPSsTFSI   | 20                | -                  | -     | 44.3          | Ma et al. <sup>11</sup>              |

## References

- (1) Kim, D.-W.; Park, J.-K.; Rhee, H.-W. Conductivity and Thermal Studies of Solid Polymer Electrolytes Prepared by Blending Poly(Ethylene Oxide), Poly(Oligo[Oxyethylene]Oxysebacoyl) and Lithium Perchlorate. *Solid State Ionics* **1996**, *83* (1), 49–56. [https://doi.org/10.1016/0167-2738\(95\)00238-3](https://doi.org/10.1016/0167-2738(95)00238-3).
- (2) Ghelichi, M.; Qazvini, N. T.; Jafari, S. H.; Khonakdar, H. A.; Farajollahi, Y.; Scheffler, C. Conformational, Thermal, and Ionic Conductivity Behavior of PEO in PEO/PMMA Miscible Blend: Investigating the Effect of Lithium Salt. *Journal of Applied Polymer Science* **2013**, *129* (4), 1868–1874. <https://doi.org/10.1002/app.38897>.
- (3) Tanaka, R.; Sakurai, M.; Sekiguchi, H.; Mori, H.; Murayama, T.; Ooyama, T. Lithium Ion Conductivity in Polyoxyethylene/Polyethylenimine Blends. *Electrochimica Acta* **2001**, *46* (10), 1709–1715. [https://doi.org/10.1016/S0013-4686\(00\)00775-1](https://doi.org/10.1016/S0013-4686(00)00775-1).
- (4) Li, J.; Khan, I. M. Highly Conductive Solid Polymer Electrolytes Prepared by Blending High Molecular Weight Poly(Ethylene Oxide), Poly(2- or 4-Vinylpyridine), and Lithium Perchlorate. *Macromolecules* **1993**, *26* (17), 4544–4550. <https://doi.org/10.1021/ma00069a020>.
- (5) Sharon, D.; Deng, C.; Bennington, P.; Webb, M. A.; Patel, S. N.; de Pablo, J. J.; Nealey, P. F. Critical Percolation Threshold for Solvation-Site Connectivity in Polymer Electrolyte Mixtures. *Macromolecules* **2022**, *55* (16), 7212–7221. <https://doi.org/10.1021/acs.macromol.2c00988>.
- (6) Wong, D. H. C.; Thelen, J. L.; Fu, Y.; Devaux, D.; Pandya, A. A.; Battaglia, V. S.; Balsara, N. P.; DeSimone, J. M. Nonflammable Perfluoropolyether-Based Electrolytes for Lithium Batteries. *Proceedings of the National Academy of Sciences* **2014**, *111* (9), 3327–3331. <https://doi.org/10.1073/pnas.1314615111>.
- (7) Gallmeyer, M.; Wu, H.-J.; Breining, W.; Lynn, D. M.; Loo, W. S. Thermal Properties and Ionic Conductivity in Salt-Containing POEM/PEO Polymer Blend Electrolytes. *ACS Appl. Polym. Mater.* **2025**. <https://doi.org/10.1021/acscpm.5c01118>.
- (8) Jo, G.; Jeon, H.; Park, M. J. Synthesis of Polymer Electrolytes Based on Poly(Ethylene Oxide) and an Anion-Stabilizing Hard Polymer for Enhancing Conductivity and Cation Transport. *ACS Macro Lett.* **2015**, *4* (2), 225–230. <https://doi.org/10.1021/mz500717j>.
- (9) Yang, M.; Epps, T. H. I. Solid-State, Single-Ion Conducting, Polymer Blend Electrolytes with Enhanced Li<sup>+</sup> Conduction, Electrochemical Stability, and Limiting Current Density. *Chem. Mater.* **2024**, *36* (4), 1855–1869. <https://doi.org/10.1021/acs.chemmater.3c02389>.
- (10) Olmedo-Martínez, J. L.; Porcarelli, L.; Alegría, Á.; Mecerreyes, D.; Müller, A. J. High Lithium Conductivity of Miscible Poly(Ethylene Oxide)/Methacrylic Sulfonamide Anionic Polyelectrolyte Polymer Blends. *Macromolecules* **2020**, *53* (11), 4442–4453. <https://doi.org/10.1021/acs.macromol.0c00703>.
- (11) Ma, Q.; Zhang, H.; Zhou, C.; Zheng, L.; Cheng, P.; Nie, J.; Feng, W.; Hu, Y.-S.; Li, H.; Huang, X.; Chen, L.; Armand, M.; Zhou, Z. Single Lithium-Ion Conducting Polymer Electrolytes Based on a Super-Delocalized Polyanion. *Angewandte Chemie International Edition* **2016**, *55* (7), 2521–2525. <https://doi.org/10.1002/anie.201509299>.
- (12) Nguyen, N.; Blatt, M. P.; Kim, K.; Hallinan, D. T.; Kennemur, J. G. Investigating Miscibility and Lithium Ion Transport in Blends of Poly(Ethylene Oxide) with a Polyanion Containing Precisely-Spaced Delocalized Charges. *Polym. Chem.* **2022**, *13* (29), 4309–4323. <https://doi.org/10.1039/D2PY00605G>.
- (13) Tanaka, R.; Fujita, T.; Nishibayashi, H.; Saito, S. Ionic Conduction in Poly(Ethylenimine)-and Poly(N-Methylethylenimine)-Lithium Salt Systems. *Solid State Ionics* **1993**, *60* (1), 119–123. [https://doi.org/10.1016/0167-2738\(93\)90284-A](https://doi.org/10.1016/0167-2738(93)90284-A).
